# Supplementary material
Source: HighWire-hosted journal article supplement (https://bmjopen.bmj.com/content/12/6/e046759)
Supplement: inline-supplementary-material-3 [file inline-supplementary-material-3.pdf]

## Appendix 3

## Functional, interactive and critical relationship to the 8 themes of disease management

| Themes                            | Functional                                                                                                       | Interactive                                                                                                                            | Critical                                                                                                                                                                                                 |
|-----------------------------------|------------------------------------------------------------------------------------------------------------------|----------------------------------------------------------------------------------------------------------------------------------------|----------------------------------------------------------------------------------------------------------------------------------------------------------------------------------------------------------|
| Physical activity                 | I walk or move every day because I've been told to be active for diabetes                                        | I am physically active because it improves my diabetes                                                                                 | I am physically active whenever possible, in relation to the life I have in hand (not only because of my diabetes). Being active is really good for me                                                   |
| Food                              | When I buy food and cook, I do try to respect the recommendations I received (from the doctor, the dietician...) | I understand that food should be balanced and diversified: I adjust my diet as best I can according to the situations of everyday life | Eating a balanced diet does not mean you have to deprive yourself. With the disease, I learned to buy and cook differently, while taking into account the cost, tastes, desires and availability of food |
| Treatment                         | I try to follow the treatment prescribed to me as best I can                                                     | I follow my treatment as best I can because I realize that it is useful                                                                | I know the role of each treatment and I adjust it according to the type of life I have, so as to achieve as good a balance as possible                                                                   |
| Follow-up                         | I keep up with my diabetes on a daily basis and show my results to my doctor regularly                           | I test when I can and discuss my diabetes care with my doctor (or other provider).                                                     | Once I understood diabetes and its evolution, I can live a normal life, while having regular tests to avoid complications.                                                                               |
| Social support and network        | I try not to bother anyone with my illness                                                                       | I realize that I am not alone and that I can count on others                                                                           | I just live like everyone else and I nearly forget that I have diabetes                                                                                                                                  |
| Relation to health care providers | I do whatever my doctor (or other provider) tells me                                                             | I have discussions with my doctor (or other) about diabetes because I want to understand what is going on                              | I know my diabetes and visit health care providers only when needed.                                                                                                                                     |
| Access to knowledge               | I stick to what my doctor says about my diabetes                                                                 | Whenever I come across something about diabetes, I look                                                                                | I don't listen to anything: I know where the sources are and I stick to that                                                                                                                             |

|           |                                                                    |                                                                                                                                                                      |                                                                                                                                                                                                                                                                                          |
|-----------|--------------------------------------------------------------------|----------------------------------------------------------------------------------------------------------------------------------------------------------------------|------------------------------------------------------------------------------------------------------------------------------------------------------------------------------------------------------------------------------------------------------------------------------------------|
|           |                                                                    | at it and try to get something out of it                                                                                                                             |                                                                                                                                                                                                                                                                                          |
| Knowledge | Diabetes is something that's wrong: it's not up to me or what I do | Diabetes is one or more things that need to be monitored independently of each other, but which I can do something about (e.g. diet and/or physical activity, etc.). | Diabetes is a set of interacting elements (the body, the organs, the environment, etc.) that puts me at risk of complications if I don't pay attention, but that I can also stabilise (or improve) if I monitor all these elements at the same time, taking into account the life I lead |
